# Supplementary material
Source: ML conference proceedings conference paper supplement (https://openreview.net/forum?id=YH9BuOU8Ki)
Supplement: supplementary_material [file Al2O3.xlsx]

## Sheet: Sheet1
0.2057	1.834	0
0.2102	1.834	0
0.2138	1.834	0
0.2175	1.834	0
0.2214	1.834	0
0.2255	1.834	0
0.2296	1.834	0
0.234	1.834	0
0.2385	1.834	0
0.2431	1.834	0
0.248	1.834	0
0.2531	1.834	0
0.2583	1.834	0
0.2638	1.834	0
0.2696	1.831	0
0.2756	1.827	0
0.2818	1.823	0
0.2884	1.82	0
0.2952	1.817	0
0.3024	1.813	0
0.31	1.81	0
0.3179	1.807	0
0.3263	1.804	0
0.3351	1.201	0
0.3444	1.799	0
0.3543	1.796	0
0.3647	1.794	0
0.3758	1.791	0
0.3785	1.789	0
0.4	1.787	0
0.4133	1.784	0
0.4276	1.782	0
0.4429	1.78	0
0.4593	1.779	0
0.4769	1.777	0
0.496	1.775	0
0.5167	1.773	0
0.5391	1.771	0
0.5636	1.77	0
0.5905	1.768	0
0.62	1.767	0
0.6526	1.765	0
0.6889	1.764	0
0.7294	1.762	0
0.775	1.761	0
0.8267	1.759	0
0.8857	1.758	0
0.9538	1.757	0
1.033	1.755	0
1.127	1.753	0
1.24	1.751	0
1.378	1.749	0
1.55	1.746	0
1.771	1.742	0
2.067	1.736	0
2.48	1.726	0
2.564	1.723	0
2.32	1.721	0
2.703	1.719	0
2.778	1.716	0
2.857	1.714	0
2.941	1.712	0
3.03	1.709	0
3.125	1.707	0
3.226	1.705	0
3.333	1.701	0
3.448	1.597	0
3.571	1.692	0
3.704	1.687	0
3.846	1.681	0
4	1.674	0
4.167	1.667	0
4.348	1.658	0
4.545	1.647	0
4.762	1.636	0
5	1.624	0
5.263	1.607	0
5.556	1.624	0
5.882	1.6	0
6.25	1.571	0
6.661	1.534	0
7.143	1.485	0
7.692	1.419	0
8.333	1.325	0
9.091	1.181	0
10	0.925	0
10.1	0.875	0.003
10.2	0.831	0.003
10.31	0.77	0.003
10.42	0.709	0.003
10.53	0.648	0.021
10.64	0.576	0.041
10.75	0.499	0.088
10.87	0.423	0.145
10.99	0.344	0.228
11.11	0.263	0.339
11.24	0.18	0.449
11.36	0.125	0.541
11.49	0.109	0.629
11.63	0.113	0.717
11.7	0.14	0.797
11.91	0.115	0.877
12.05	0.116	0.957
12.2	0.116	1.036
12.35	0.117	1.116
12.5	0.118	1.197
12.66	0.119	1.278
12.82	0.119	1.36
12.99	0.12	1.41
13.16	0.121	1.537
13.33	0.121	1.637
13.51	0.122	1.736
13.7	0.122	1.836
13.89	0.124	1.947
14.09	0.126	2.058
14.29	0.129	2.169
14.49	0.131	2.296
14.71	0.142	2.441
14.93	0.167	2.585
15.15	0.192	2.811
15.39	0.251	3.175
15.63	0.807	3.642
15.87	0.502	3.04
16.13	0.361	3.479
16.39	0.377	4.082
16.67	0.516	4.784
16.95	2.155	5.601
17.24	4.935	7.345
17.54	6.713	5.552
17.86	7.407	0.816
18.18	5.406	0.487
18.52	4.391	0.378
18.87	3.526	0.35
19.23	2.722	0.357
19.61	2.089	0.584
20	1.674	1.002
20.41	1.035	1.366
20.83	0.312	1.879
